# Supplementary material for: Davydov splitting in cadmium vacancy emission, ferromagnetism and photosensitivity in manganese incorporated CdS nanocrystals
Source: Royal Society of Chemistry journal article supplement (doi:10.1039/c4ra01899k), 2014-01-01
Supplement: c4ra01899k1.pdf [file c4ra01899k1.pdf]

## Electronic Supplementary Information

### Davydov Splitting in Cadmium Vacancy Emission, Ferromagnetism and Photosensitivity in Manganese incorporated CdS nanocrystals

Balaji Sambandam<sup>a</sup>, Thangavelu Muthukumar<sup>b</sup>, Sonachalam Arumugam<sup>c</sup> P. L. Paulose<sup>d</sup>  
and Periakaruppan T Manoharan<sup>a\*</sup>

ESI. Table 1: Average particle size for SLS/BD and SLS/PD assisted Mn<sup>2+</sup>-CdS nanocrystals from XRD measurement using Debye-Scherrer formula.

| System                     | Average particle size (nm) |        |
|----------------------------|----------------------------|--------|
|                            | SLS/BD                     | SLS/PD |
| CdS                        | 9.0                        | 12.5   |
| 0.1% Mn <sup>2+</sup> -CdS | 9.2                        | 13.5   |
| 0.5% Mn <sup>2+</sup> -CdS | 9.0                        | 12.0   |
| 1% Mn <sup>2+</sup> -CdS   | 10.5                       | 14.5   |
| 5% Mn <sup>2+</sup> -CdS   | 10.0                       | 14.0   |

#### Deconvolution of XRD pattern using Short and Steward Method

The quantitative percentage of cubic or hexagonal phase in a given system of Mn<sup>2+</sup>/CdS can be calculated from the following equation which was earlier proposed by Short and Steward.<sup>23</sup>

$$H = \frac{1.96R}{0.96R + 1} \quad (1)$$

where R is the ratio of the integrated intensities of the cubic and hexagonal components measured in the ranges  $2\theta = 46.75-48.75^\circ$  (peak H (103)) and  $2\theta = 42.75-44.75^\circ$  (peak H (110) or C (220)). A careful deconvolution of the XRD patterns of all Mn<sup>2+</sup> added samples was performed in order to get the ratio of cubic vs hexagonal as defined in equation (1). The resulting values are

summarized in Table 1. While the peak around  $2\theta \approx 42-45^\circ$  accounts for both hexagonal (110) and cubic (220), the peak at  $48.2^\circ$  (in our work) corresponds to pure hexagonal phase (103). The deconvolution profile for SLS/BD and SLS/PD samples are shown below (ESI Fig. 1)

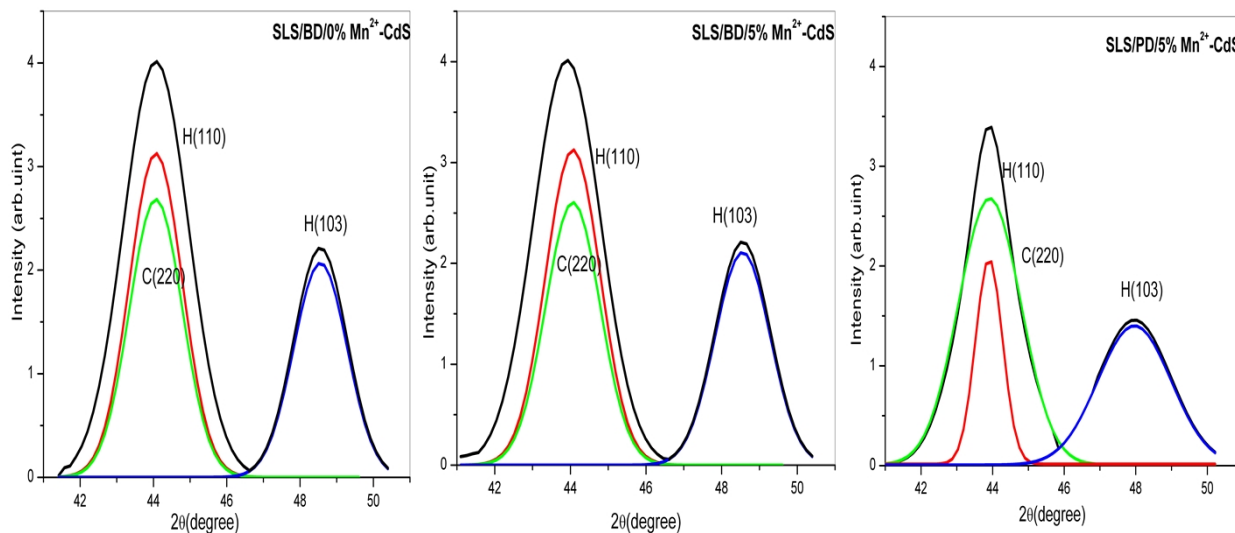

**ESI Fig. 1. Deconvolution of XRD pattern for SLS/BD assisted CdS (left) and 5% Mn<sup>2+</sup>-CdS (middle) and SLS/PD assisted Mn<sup>2+</sup>-CdS (right) nanocrystals**

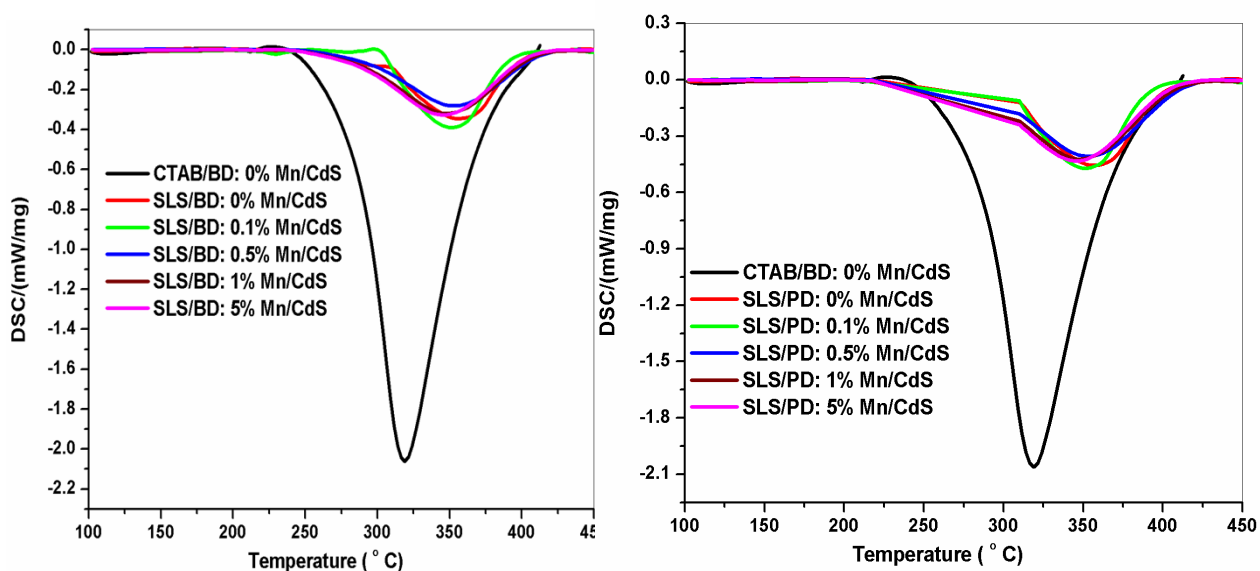

**ESI Fig. 2: DSC profile for (a) SLS/BD and (b) SLS/PD assisted various concentrations of manganese doped CdS nanocrystal. CTAB/BD assisted 0% Mn<sup>2+</sup>/CdS nanocrystals taking as a reference due to its pure cubic nature.**

**ESI. Table 2: A comparison of percentages of cubic and hexagonal components in SLS/BD/n%Mn<sup>2+</sup>/CdS calculated from XRD (Short and Steward method) and DSC measurements.**

| System                            | Area of the curve | % of cubic  | % of hexagonal |
|-----------------------------------|-------------------|-------------|----------------|
| CTAB/BD/0%Mn <sup>2+</sup> -CdS   | 128.1             | 100         | 0              |
| SLS/BD/0% Mn <sup>2+</sup> -CdS   | 24.8              | 19.4(19.0*) | 80.6(81.0*)    |
| SLS/BD/0.1% Mn <sup>2+</sup> -CdS | 23.7              | 18.5(18.2*) | 81.5(81.8*)    |
| SLS/BD/0.5% Mn <sup>2+</sup> -CdS | 24.1              | 18.8(18.5*) | 81.2(81.5*)    |
| SLS/BD/1% Mn <sup>2+</sup> -CdS   | 24.3              | 19.0(18.7*) | 81.0(81.3*)    |
| SLS/BD/5% Mn <sup>2+</sup> -CdS   | 24.3              | 19.0(18.7*) | 81.0(81.3*)    |

\*denotes result from XRD data

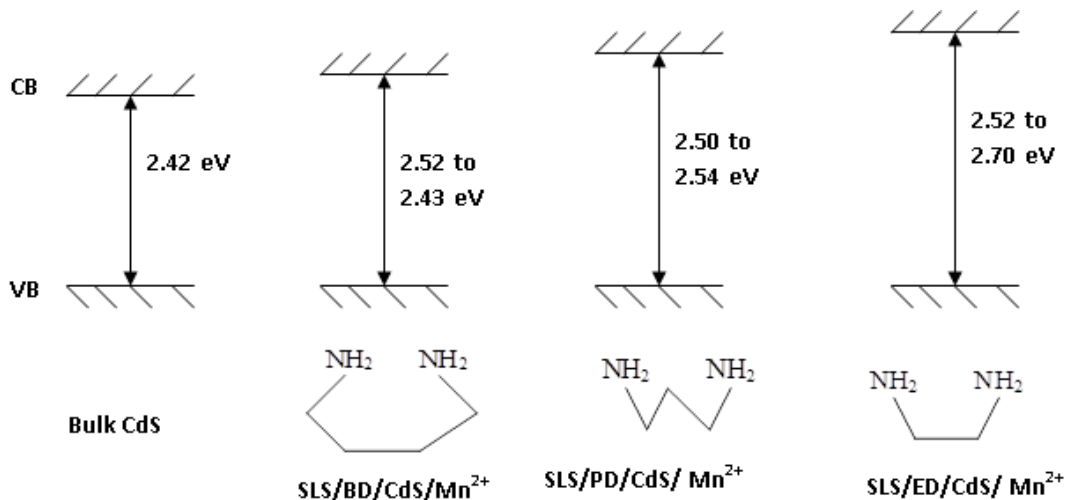

**ESI. Fig. 3. Comparison of band gap energies for ligand chain length dependent CdS/Mn<sup>2+</sup>**

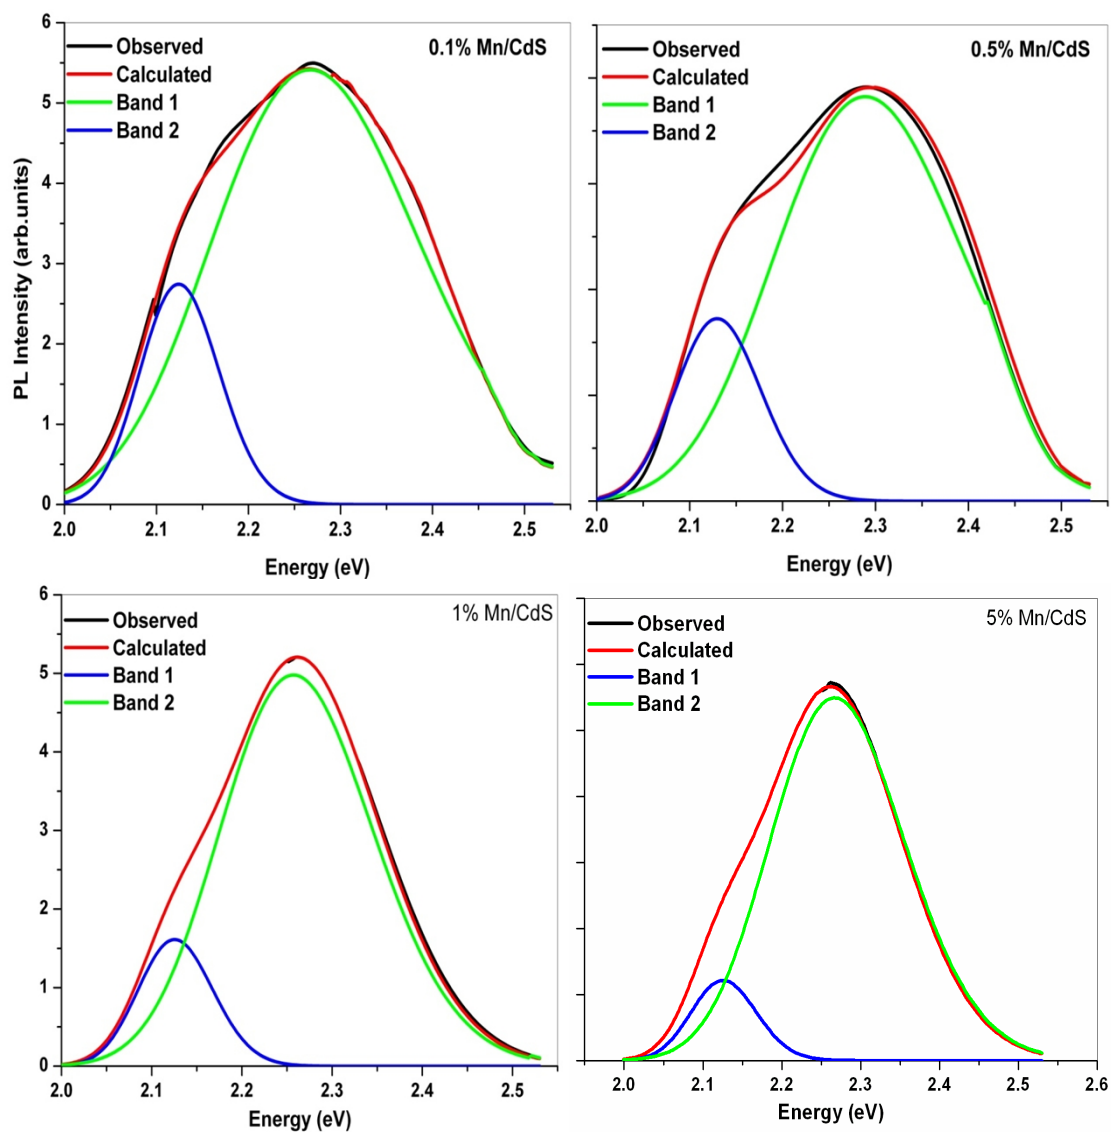

**ESI Fig. 4: PL deconvolution energy profile for SLS/PD assisted CdS/Mn<sup>2+</sup> nanocrystals for various concentrations of Mn<sup>2+</sup> .**

**ESI Table 3: PL deconvolution energy values for  $V_{Cd}$  and Mn d-d emissions for 0.1% to 5% manganese doped CdS nanocrystals assisted by SLS/PD medium.**

| System            | Peak position (eV) | Peak width ( $cm^{-1}$ ) | Peak amplitude (a.u) | Peak intensity (a.u) |
|-------------------|--------------------|--------------------------|----------------------|----------------------|
| Pure CdS $V_{Cd}$ | 2.26               | 2005                     | 5.55                 | 5564                 |
| 0.1% $V_{Cd}$     | 2.27               | 2001                     | 5.45                 | 5453                 |
| $Mn^{2+}$         | 2.13               | 570                      | 2.7                  | 770                  |
| 0.5% $V_{Cd}$     | 2.26               | 1998                     | 5.4                  | 5395                 |
| $Mn^{2+}$         | 2.13               | 570                      | 2.4                  | 684                  |
| 1% $V_{Cd}$       | 2.25               | 1821                     | 5.3                  | 4826                 |
| $Mn^{2+}$         | 2.13               | 568                      | 1.6                  | 454                  |
| 5% $V_{Cd}$       | 2.26               | 1734                     | 5.1                  | 4422                 |
| $Mn^{2+}$         | 2.13               | 568                      | 1.1                  | 312                  |

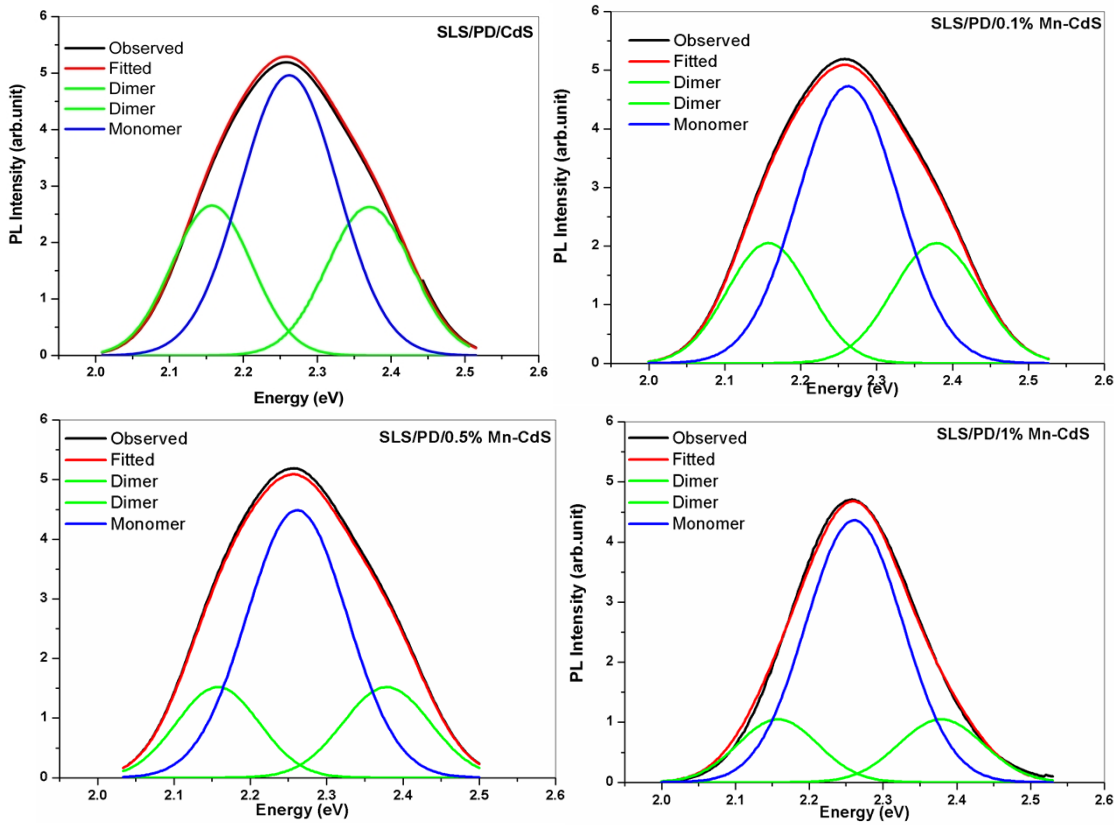

**ESI Fig. 5. Photoluminescence deconvolution of cadmium vacancies ( $V_{Cd}$ ) for SLS/PD assisted manganese incorporated CdS nanocrystals.**

**ESI Table 4. Deconvolution of photoluminescence energy values of cadmium vacancies ( $V_{Cd}$ ) emission in SLS/PD assisted Mn/CdS nanocrystals showing Davydov Splitting.**

| SLS/PD assisted $Mn^{2+}$ -CdS | Peak position (eV) | Peak width ( $cm^{-1}$ ) | Peak amplitude (a.u) | Peak intensity (a.u) |      |
|--------------------------------|--------------------|--------------------------|----------------------|----------------------|------|
| Pure CdS $V_{Cd}$              | Monomer            | 2.26                     | 1733                 | 5.0                  | 4333 |
|                                | Dimer              | 2.379                    | 1334                 | 2.6                  | 1734 |
|                                |                    | 2.149                    |                      |                      |      |
| 0.1% Mn/CdS $V_{Cd}$           | Monomer            | 2.26                     | 1733                 | 4.75                 | 4116 |
|                                | Dimer              | 2.379                    | 1334                 | 2.1                  | 1401 |
|                                |                    | 2.149                    |                      |                      |      |
| 0.5% Mn/CdS $V_{Cd}$           | Monomer            | 2.26                     | 1733                 | 4.5                  | 3899 |
|                                | Dimer              | 2.379                    | 1334                 | 1.52                 | 1014 |
|                                |                    | 2.149                    |                      |                      |      |
| 1% Mn/CdS $V_{Cd}$             | Monomer            | 2.26                     | 1733                 | 4.3                  | 3726 |
|                                | Dimer              | 2.379                    | 1334                 | 1.1                  | 734  |
|                                |                    | 2.149                    |                      |                      |      |

Dimer energy separation = 0.23 eV

## Synthesis of CNP:

Cotton wicks were put in a 50ml capacity earthenware pot containing 40 ml of ‘sesamum Indicum’ oil. On lighting the wicks the smoke emanates with soot which was collected from the bottom spherical surface of the earthenware pot. Collection of the soot was achieved by the use of stainless steel scalpel and stored separately.

## CNP and CdS based heterostructures

Different concentrations of undoped CdS nanoparticles with 5mg of CNP were manually and homogeneously mixed and analyzed for their best photovoltaic performance and decided on using 5 mg of CdS (undoped CdS assisted by SLS/BD) nanoparticles for further experimentation. The same concentration is also fixed for 5% Mn/CdS samples of SLS/BD and SLS/PD origin;. The films were cast using 1 g of polyurethane solution by slow stirring using magnetic stirrer (100rpm). In a typical experiment 1 g of polyurethane in 25 ml of tetrahydrofuran (THF) solvent were taken and heated at 60°C. The polyurethane solution was then mixed with a fixed concentrations (5 mg of each) of CNP and separately CNP + CdS/ 0% and 5% Mn<sup>2+</sup> nanoparticles of SLS/BD and SLS/PD origin using Ultra Turrax (T-25 basic, 1KA werke). The air bubbles were removed by using vacuum pump and were poured in to a glass tray with dimension of measuring 7.5 x 8.5cm, which has the anode (Aluminum) and cathode (Copper) were placed as shown in the ESI Fig. 6 with the distance gap of 3mm interval among the material and they were air dried at room temperature at 30-35 °C and stored.

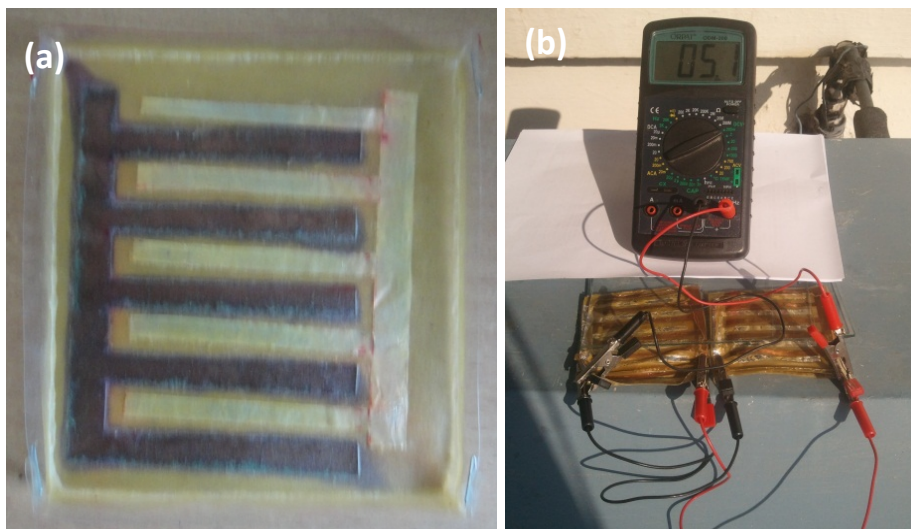

**ESI Fig. 6. (a) SLS/BD assisted CdS nanocrystals and CNP heterostructure based panel and (b) experimental set up for voltage measurement.**
